# Supplementary material for: Resistance to Durvalumab and Durvalumab plus Tremelimumab Is Associated with Functional STK11 Mutations in Patients with Non–Small Cell Lung Cancer and Is Reversed by STAT3 Knockdown
Source: Oxford University Press journal article supplement (doi:10.1158/2159-8290.cd-20-1543), 2021-07-06
Supplement: 21598290cd201543-sup-254346_2_supp_7196711_qlv0bx.docx [file 21598290cd201543-sup-254346_2_supp_7196711_qlv0bx.docx]

**Supplementary Table S3.** Cytokines and other soluble factors evaluated in the baseline serum of patients with *STK11*mut or *STK11*wt tumors.

| **List of 66 soluble factors evaluated in serum derived from NSCLC patients enrolled in Study 1108** | | | |
| --- | --- | --- | --- |
| CRP | Ang2 | TNFSF13 (APRIL) | Factor VIII |
| IL6 | vWF | RANTES | Thyroxine-binding globulin (TBG) |
| S100A12 (EN-RAGE) | TNFRSF1B (TNFR2) | SCF (stem cell factor) | Myoglobin |
| CXCL8 (IL8) | Adiponectin | Vitronectin | Eotaxin-1 |
| ST2 | CD163 | IL12p40 | CCL17 (TARC) |
| Ferritin | IL18 | MCP1 | Lysophosphaditic acid (LPA) |
| TNFSF13 (BAFF) | Aldose reductase | CXCL9 (MIG) | BDNF |
| IL2RA (CD25) | IL1Ra | CXCL13 (BLC) | TWEAK |
| CSF1 (M-CSF) | PAI-1 | MIP1beta | Protein Phosphatase Catalytic Subunits (PPP) |
| CXCL11 (ITAC) | PARC | MIP3beta | LH |
| TIMP1 | Prolactin | CCL21A (Ckine) | FSH |
| Resistin | DKK1 | Total glucagon-like peptide (GLP1) | Osteocalcin |
| MIF | MMP3 | Serum amyloid protein (SAP) |  |
| GDF15 | p-selectin | CCL8 (MCP2) |
| VEGFA | CXCL10 (IP10) | IL23 |
| CA.15.3 | ICAM1 | ACE |
| IGFBP2 | VCAM1 | Alpha2 Macroglobulin |
| Periostin | B2M | SDF1 |
